# Supplementary material for: Size- and morphology-controlled biomimetic synthesis of hierarchical hollow BaCO3
Source: Royal Society of Chemistry journal article supplement (doi:10.1039/c2ce25832c), 2012-01-01
Supplement: c2ce25832c.pdf [file c2ce25832c.pdf]

## Supporting information

### Size- and Morphology-Controlled Biomimetic Synthesis of Hierarchical Hollow BaCO<sub>3</sub>

Xiaoming Ma\*, Caiyun Su, Lin Yang\*, Liping Li, Kui Wang, Jianguo Zhou, Shibao Yuan

College of Chemistry and Environmental Science, Henan Normal University, Engineering Technology Research Center of Motive Power and Key Materials of Henan Province, Xinxiang 453007, P. R. China.

\* To whom correspondence should be addressed. Tel: +86-373-3325058; Fax: +86-373-3328507.

e-mail: yanglin1819@yeah.net (Lin Yang)

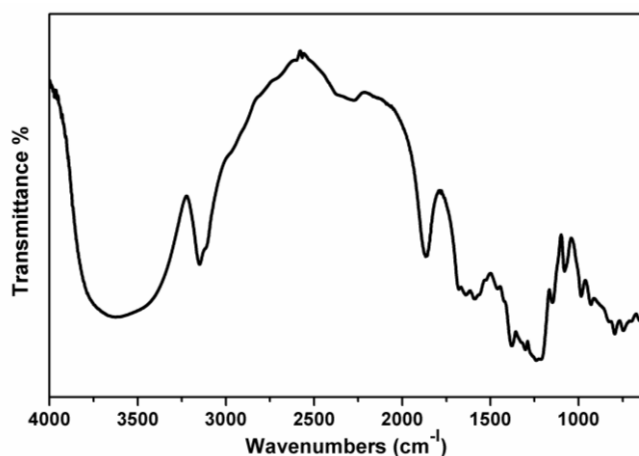

Figure S1 FT-IR spectra of anhydrous starch.

From the result, compared the IR spectrum of the BaCO<sub>3</sub>-starch material with that of anhydrous starch, it could be found that the functional groups C-O and O-H could play the key role in the formation the BaCO<sub>3</sub> crystals with hollow superstructures.

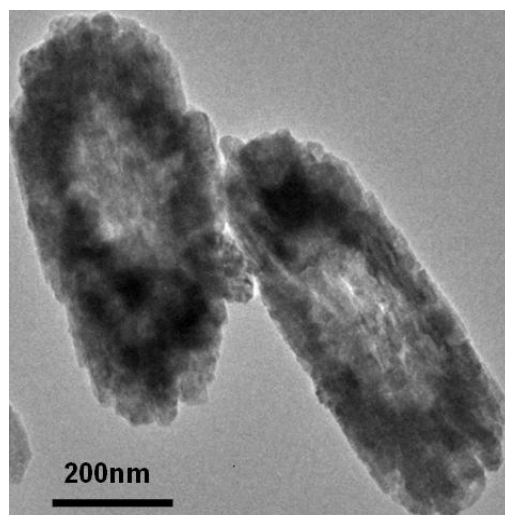

**Figure S2** TEM images of a typical shuttle-like BaCO<sub>3</sub> sample calcined to 500 °C.
